# Supplementary material for: High-efficiency red electrophosphorescence based on neutral bis(pyrrole)-diimine platinum(ii) complex
Source: Royal Society of Chemistry journal article supplement (doi:10.1039/b415711g), 2005-01-01
Supplement: b415711g.doc [file b415711g.doc]

**Supplementary Information for *Chem. Commun.***

High-efficiency red electrophosphorescence based on neutral *bis*(pyrrole)-diimine platinum(II) complex

Hai-Feng Xiang,*a,b* Siu-Chung Chan,*a* Kitty Kit-Ying Wu,*a* Chi-Ming Che**a* and P. T. Lai*b*

a Department of Chemistry and the HKU-CAS Joint Laboratory on New Materials,

The University of Hong Kong, Pokfulam Road, Hong Kong SAR, China.

Fax: 852-28571586; E-mail: [cmche@hku.hk](mailto:cmche@hku.hk)

b Department of Electrical and Electronic Engineering, The University of Hong Kong, Pokfulam Road, Hong Kong SAR, China.

General experimental procedure, syntheses, and electroluminescent properties of the reported Pt(II) complexes are described.

# Experimental

**PtPren**1: Sodium acetate (0.077 g, 0.93 mmol) was suspended in a solution of H2Pren (0.1 g, 0.47 mmol) in freshly distilled DMF (10 ml). K2PtCl4 (0.19 g, 0.47 mmol) in DMSO (1 ml) was added dropwise to the suspension at 80 °C. The resulting yellow solution turned orange-red after 4 hours. After cooling, distilled water (50 ml) was added to the mixture to afford an orange-brown precipitate. The solid product was filtered and washed with H2O (2 × 10 ml) to give an orange-brown solid, which was then purified by silica gel column chromatography using CH2Cl2 as the eluent. Removal of the solvent gave an orange solid, which was recrystallized using acetonitrile to give orange red crystals. Yield: 42 mg, 22 %. 1H NMR (300 MHz, CDCl3): ** = 7.67 (s, 2H, HC=N), 7.10 (m, 2H, pyrrole), 6.71 (d, *J* = 3.3 Hz, 2H, pyrrole), 6.29 (dd, *J* = 3.9, 1.8 Hz, 2H, pyrrole), 4.18 (s, 4H, CH2). 13C NMR (CDCl3): ** = 155.7, 145.4, 137.7, 119.0, 110.7, 59.4. FAB-MS (*m*-NBA) (*m/z*): 407 {*M*+}. Anal. Calcd (%) for C12H12N4Pt: C, 35.38; H, 2.97; N, 13.75. Found: C, 35.36; H, 2.94; N, 13.45.

**PtPrtmen:** The title compoundwas prepared in a manner similar to that for **PtPren** to give orange crystals. Yield: 66 %. 1H NMR (300 MHz, CDCl3): ** = 8.27 (s, 2H, HC=N), 7.09 (virtual s, 2H, pyrrole), 6.63 (d, *J* = 3.6 Hz, 2H, pyrrole), 6.14 (dd, *J* = 3.7, 1.8 Hz, 2H, pyrrole), 1.42 (s, 12H, CH3). 13C NMR (CDCl3): ** = 154.8, 145.5, 136.6, 118.5, 110.5, 76.1, 24.3. FAB-MS (*m*-NBA) (*m/z*): 463 {*M*+}. Anal. Calcd (%) for C16H20N4Pt: C, 41.47; H, 4.35; N, 12.09. Found: C, 41.45; H, 4.36; N, 11.98.

**PtPrdmphen**: The title compoundwas prepared in a manner similar to that for **PtPren** to give deep red crystals. Yield: 15 %. 1H NMR (300 MHz, CDCl3): ** = 7.98 (s, 2H, HC=N), 7.1 (m, 4H, pyrrole), 6.90 (d, *J* = 0.8 Hz, 2H, pyrrole and aryl), 6.39 (dd, *J* = 4.0, 1.7 Hz, 2H, pyrrole), 2.28 (s, 6H, CH3). 13C NMR (CDCl3): ** = 145.9, 144.7, 143.0, 139.9, 136.2, 121.2, 117.1, 112.4, 19.9. FAB-MS (*m*-NBA) (*m/z*): 483 {*M*+}. Anal. Calcd ( %) for C18H16N4Pt: C, 44.72; H, 3.34; N, 11.59. Found: C, 44.61; H, 3.33; N, 11.44.

All EL devices of this study were prepared on patterned indium-tin-oxide (ITO) glass with a sheet resistance of 20 /. The configuration of the OLEDs is ITO/NPB (40 nm)/CBP:Pt(II) complex (*x* wt %, 30 nm)/BCP (10 nm)/Alq3 (30 nm)/LiF (0.5 nm)/Al (150 nm). *N*,*N*'-*bis*(naphthyl)-*N*,*N*'-diphenyl-1,1'-biphenyl-4,4'-diamine (NPB) was employed as the hole-transporting material, 2,9-dimethyl-4,7-diphenyl-1,10-phenanthroline (BCP) was employed as hole-blocking material, and *tris*-(8-hydroxyquinolato) aluminum (Alq3) was employed as electron-transporting material. All layers of the OLEDs were grown on the matrix layer by thermal evaporation under a vacuum of 1 × 106 Torr. The performance of the devices was examined using Photoresearch PR650 and Keithley 2400 sourcemeter in air without encapsulation. All chemicals were sublimed before use. The external quantum efficiencies were calculated based on the method described by Okamoto and coworkers using luminance, EL spectrum and current density.2

# EL performance

**Fig. 1**. Current density and brightness curves of 6.0 % **PtPren**- and 5.0 % **PtPrtmen**-doped OLEDs against applied voltage.

**Table 1** EL performance of **PtPren**- and **PtPrtmen**-based OLEDs at different dopant concentrations (current density [mA cm2] in parentheses).

|  | Dopant  / wt % | *Von*  / V | *Bmax*  / cd m2 | *ext,max*  / % | *L,max*  / cd A1 | *P,max*  / lm W1 |
| --- | --- | --- | --- | --- | --- | --- |
| **PtPren** | 0.8 | 3.5 | 8 030 (907) | 4.1 (9.1) | 7.1 (4.1) | 3.1 (9.1) |
|  | 1.5 | 3.4 | 9 700 (825) | 5.5 (8.7) | 7.4 (8.7) | 3.5 (8.7) |
|  | 3.0 | 3.5 | 10 050 (786) | 5.9 (7.4) | 8.6 (7.4) | 3.8 (7.4) |
|  | 6.0 | 3.2 | 11 100 (728) | 6.5 (7.6) | 9.0 (16) | 4.0 (7.6) |
|  | 8.0 | 3.3 | 9 500 (609) | 5.6 (6.2) | 7.5 (6.2) | 3.3 (6.2) |
| **PtPrtmen** | 1.0 | 3.3 | 8 200 (954) | 3.9 (9.8) | 10.2 (9.8) | 4.8 (3.6) |
|  | 3.0 | 3.2 | 9 150 (886) | 4.4 (8.8) | 11.9 (8.8) | 5.3 (8.8) |
|  | 5.0 | 2.9 | 10 120 (802) | 4.9 (8.4) | 13.1 (8.4) | 5.9 (8.4) |
|  | 8.0 | 3.0 | 9 250 (651) | 4.2 (6.8) | 11.6 (6.8) | 5.1 (6.8) |

**Table 2** EL performance of 6.0 % **PtPren** and 5.0 % **PtPrtmen**-doped OLEDs at different current density.

|  | Current density  / mA cm2 | *V*  / V | *B*  / cd m2 | *ext*  / % | *L*  / cd A1 | *P*  / lm W1 |
| --- | --- | --- | --- | --- | --- | --- |
| **PtPren**  (6.0 %) | 1.0 | 4.8 | 18 | 1.5 | 2.2 | 1.5 |
| 8.0 | 7.1 | 717 | 6.4 | 8.8 | 3.9 |
| 20 | 8.3 | 1 950 | 6.2 | 9.0 | 3.4 |
| 100 | 10.9 | 6 600 | 4.6 | 6.5 | 1.9 |
| 500 | 15.6 | 11 080 | 1.5 | 2.2 | 0.5 |
| **PtPrtmen**  (5.0 %) | 1.0 | 4.9 | 73 | 2.6 | 6.9 | 4.5 |
| 8.0 | 6.9 | 1 021 | 4.6 | 12.8 | 5.6 |
| 20 | 7.8 | 1 816 | 3.2 | 8.6 | 3.5 |
| 100 | 10.1 | 4 400 | 1.7 | 4.5 | 1.4 |
| 500 | 14.3 | 9 680 | 0.7 | 1.9 | 0.4 |

# Reference

1 M. Riederer, E. Urban and W. Sawodny, *Angew. Chem. Int. Ed. Engl.*, 1977, **16**, 860.

2 S. Okamoto, K. Tanaka, Y. Izumi, H. Adachi, T. Yamaji and T. Suzuki, *Jpn. J. Appl. Phys.*,
 2001, **40**, L783.
